# Supplementary material
Source: PubMed Central journal article supplement (PMC7132835)
Supplement: mmc1.pdf [file mmc1.pdf]

YMTHE, Volume 28

## **Supplemental Information**

### **miR-206 Reduces the Severity of Motor Neuron Degeneration in the Facial Nuclei of the Brainstem in a Mouse Model of SMA**

**Valeria Valsecchi, Serenella Anzilotti, Angelo Serani, Giusy Laudati, Paola  
Brancaccio, Natascia Guida, Ornella Cuomo, Giuseppe Pignataro, and Lucio Annunziato**

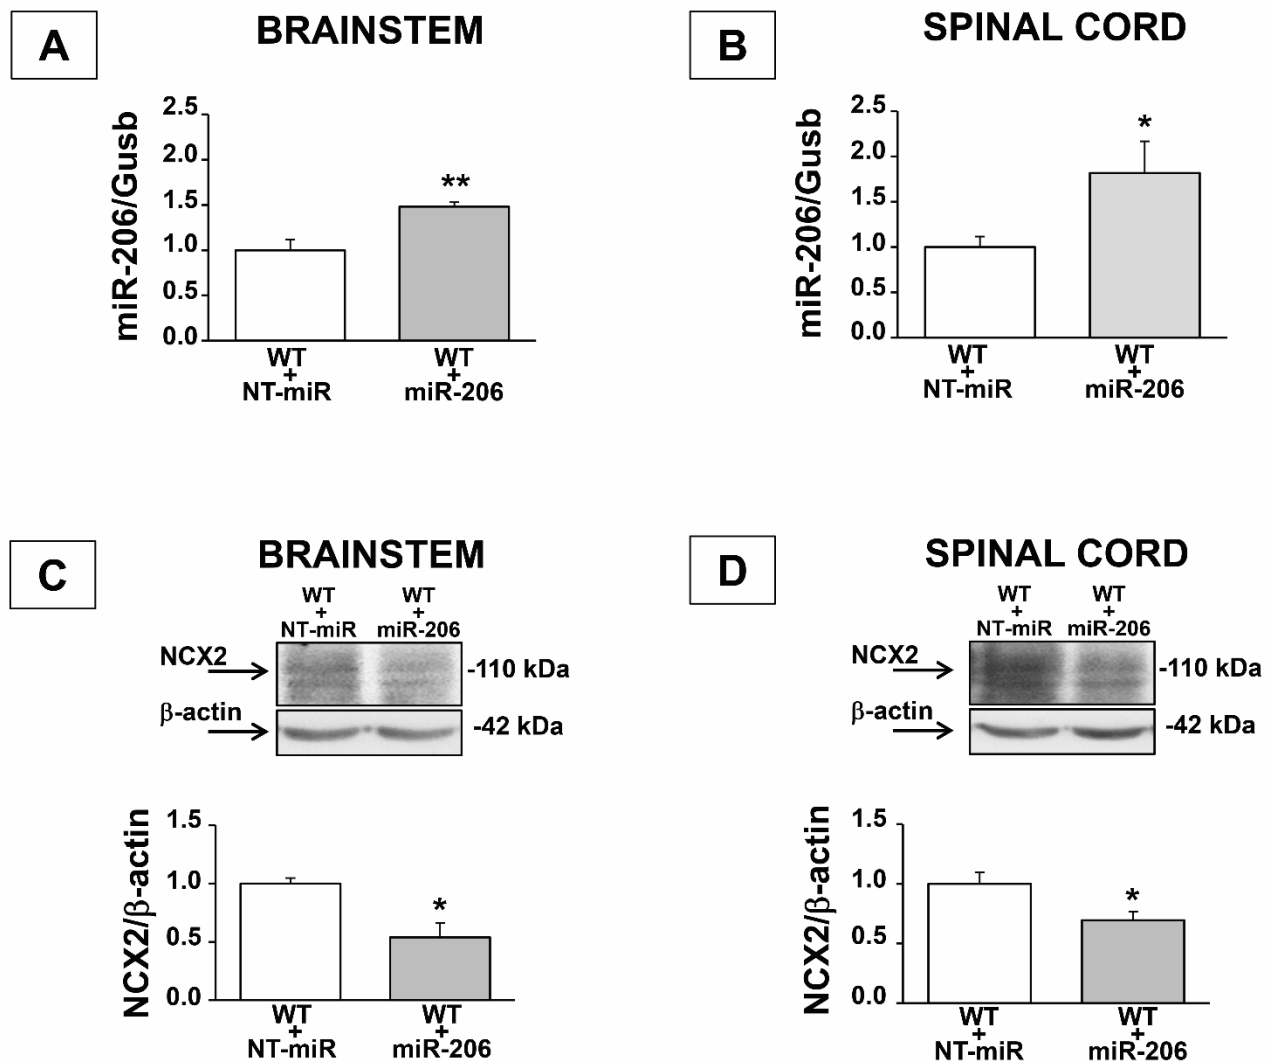

**Figure S1**

**Figure S1. miR-206 levels increased and NCX2 protein decreased in the brainstem and in the spinal cord after icv injection of miR-206 molecule.** Panel A-B, real time PCR for miR-206 in the brainstem (A) and in the spinal cord (B) of P12 WT+NT-miR (white columns) and WT+miR-206 (grey) mice icv injected with NT-miR or miR-206 at P3, P6 and P10. Each column represents the mean  $\pm$  SEM (n=5). Panel C-D, Western blot analysis for NCX2 protein in the brainstem (C) and in the spinal cord (D) of P12 WT+NT-miR (white) and WT+miR-206 (grey) mice icv injected with NT-miR or miR-206 at P3, P6 and P10. Each column represents the mean  $\pm$  SEM (n=3/5). \*p<0.05; \*\*p<0.05 vs respective control by Student's t-test.

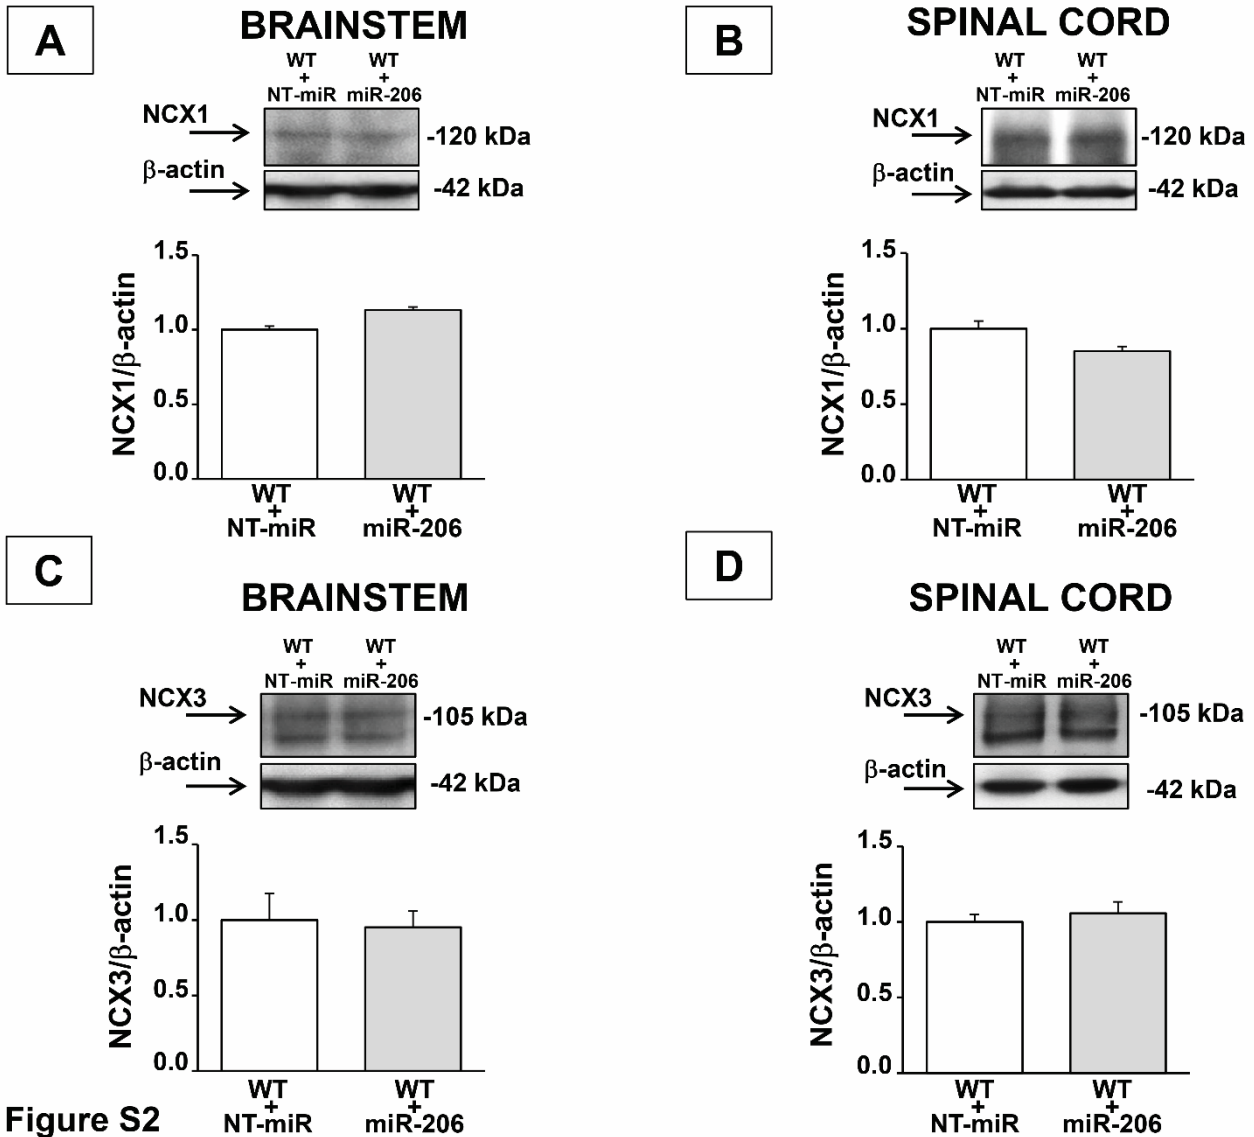

**Figure S2**

**Figure S2. NCX1 and NCX3 protein expression did not change in the brainstem and in the spinal cord after icv injection of miR-206 molecule.** Panel A-D, Western blot analysis for NCX1 (A, B) and NCX3 (C, D) proteins in the brainstem (A, C) and in the spinal cord (B, D) of P12 WT+NT-miR (white columns) and WT+miR-206 (grey) mice, icv injected with NT-miR or miR-206 at P3, P6 and P10. Each column represents the mean  $\pm$  SEM (n=3/4).
